# Supplementary material
Source: Research Square preprint supplement (doi:10.21203/rs.3.rs-9284700/v1)
Supplement: Supplementary file 1 [file 40750f2c91565c27feb3c1d7.pdf]

# Supplementary Information

## GaN-coated III–V photoelectrocatalyst with oxide-free interface and ambipolar charge transport

Haoqing Su<sup>1,2</sup>, Sahar Shekarabi<sup>3</sup>, Xiaohan Ma<sup>1,2</sup>, Wentao Zhang<sup>1,2</sup>, Mohammad Amin Zare Pour<sup>3,4</sup>, Steffen Fengler<sup>5</sup>, Chengxing He<sup>1,2</sup>, Tianshuo Zhao<sup>1,2</sup>, Thomas Dittrich<sup>5</sup>, Thomas Hannappel<sup>3\*</sup>, Shu Hu<sup>1,2\*</sup>

<sup>1</sup> Department of Chemical and Environmental Engineering, Yale University, New Haven, CT 06510, USA

<sup>2</sup> Energy Sciences Institute, Yale University, 810 West Campus Drive, West Haven, CT 06516, USA

<sup>3</sup> Fundamentals of Energy Materials, Institute of Physics, Technische Universität Ilmenau, 98693 Ilmenau, Germany

<sup>4</sup> BMFTR Junior Research Group PARASOL, Institute of Physics, Faculty of Mathematics and Natural Sciences, Technische Universität Ilmenau, 98693 Ilmenau, Germany

<sup>5</sup> Helmholtz-Zentrum Berlin für Materialien und Energie GmbH, CE-NSLI, Schwarzschildstr. 8, D-12489 Berlin, Germany

**\*Corresponding Authors**

E-mail: [shu.hu@yale.edu](mailto:shu.hu@yale.edu), [thomas.hannappel@tu-ilmenau.de](mailto:thomas.hannappel@tu-ilmenau.de)

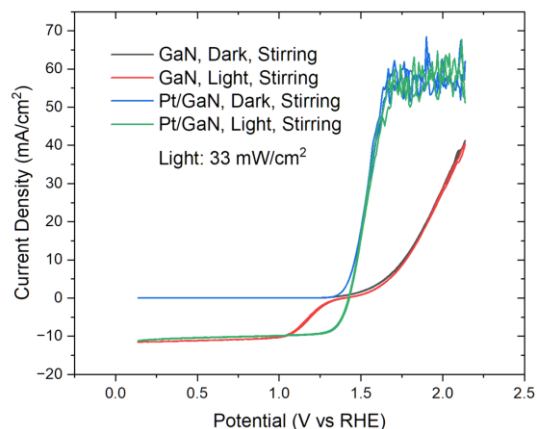

17  
 18 **Supplementary Fig. 1** Cyclic voltammetry of p-type InP with 10 nm GaN, with or without 2.5 nm sputtered  
 19 Pt, in 0.1 M K<sub>2</sub>SO<sub>4</sub> electrolyte dissolved with 10 mM/10 mM ferrocyanide/ferricyanide redox mediators,  
 20 with the solution stirred, measured under AM 1.5G illumination (Xe lamp, 33 mW cm<sup>-2</sup>) or in the dark.

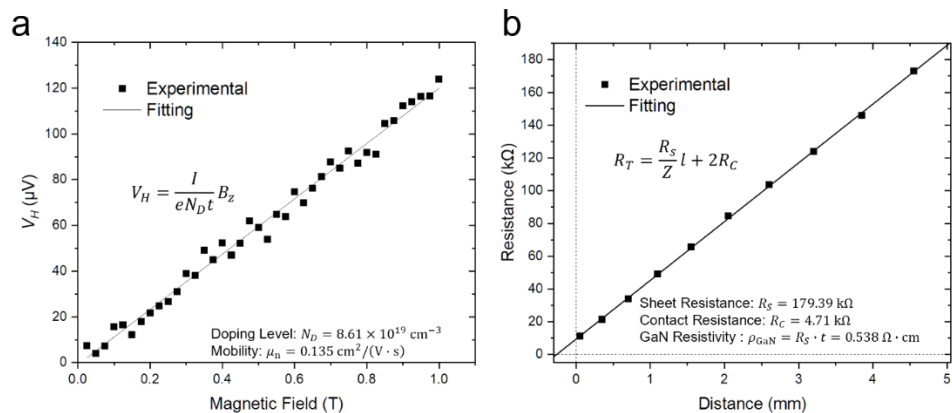

21  
 22 **Supplementary Fig. 2 a**, Hall measurement result and **b**, transfer length measurement (TLM) result of  
 23 ALD-grown 50 nm GaN on a quartz substrate. The doping level and resistivity of GaN are extracted,  
 24 respectively, from the measurements.

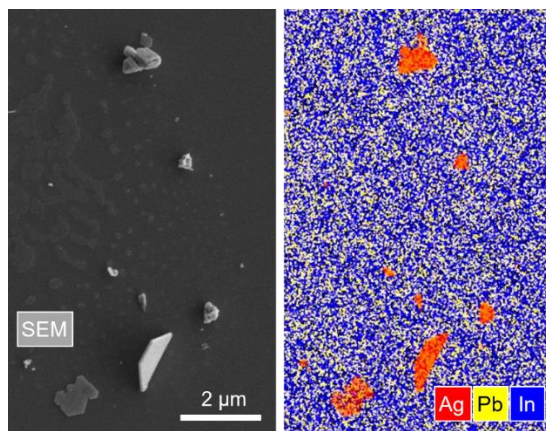

25  
 26 **Supplementary Fig. 3** SEM-EDX mapping of p-type InP with 10 nm TiO<sub>2</sub> after photoelectrochemical  
 27 deposition in a 10 mM AgNO<sub>3</sub> and 10 mM Pb(NO<sub>3</sub>)<sub>2</sub> solution, both dissolved in 1M HClO<sub>4</sub> electrolytes.

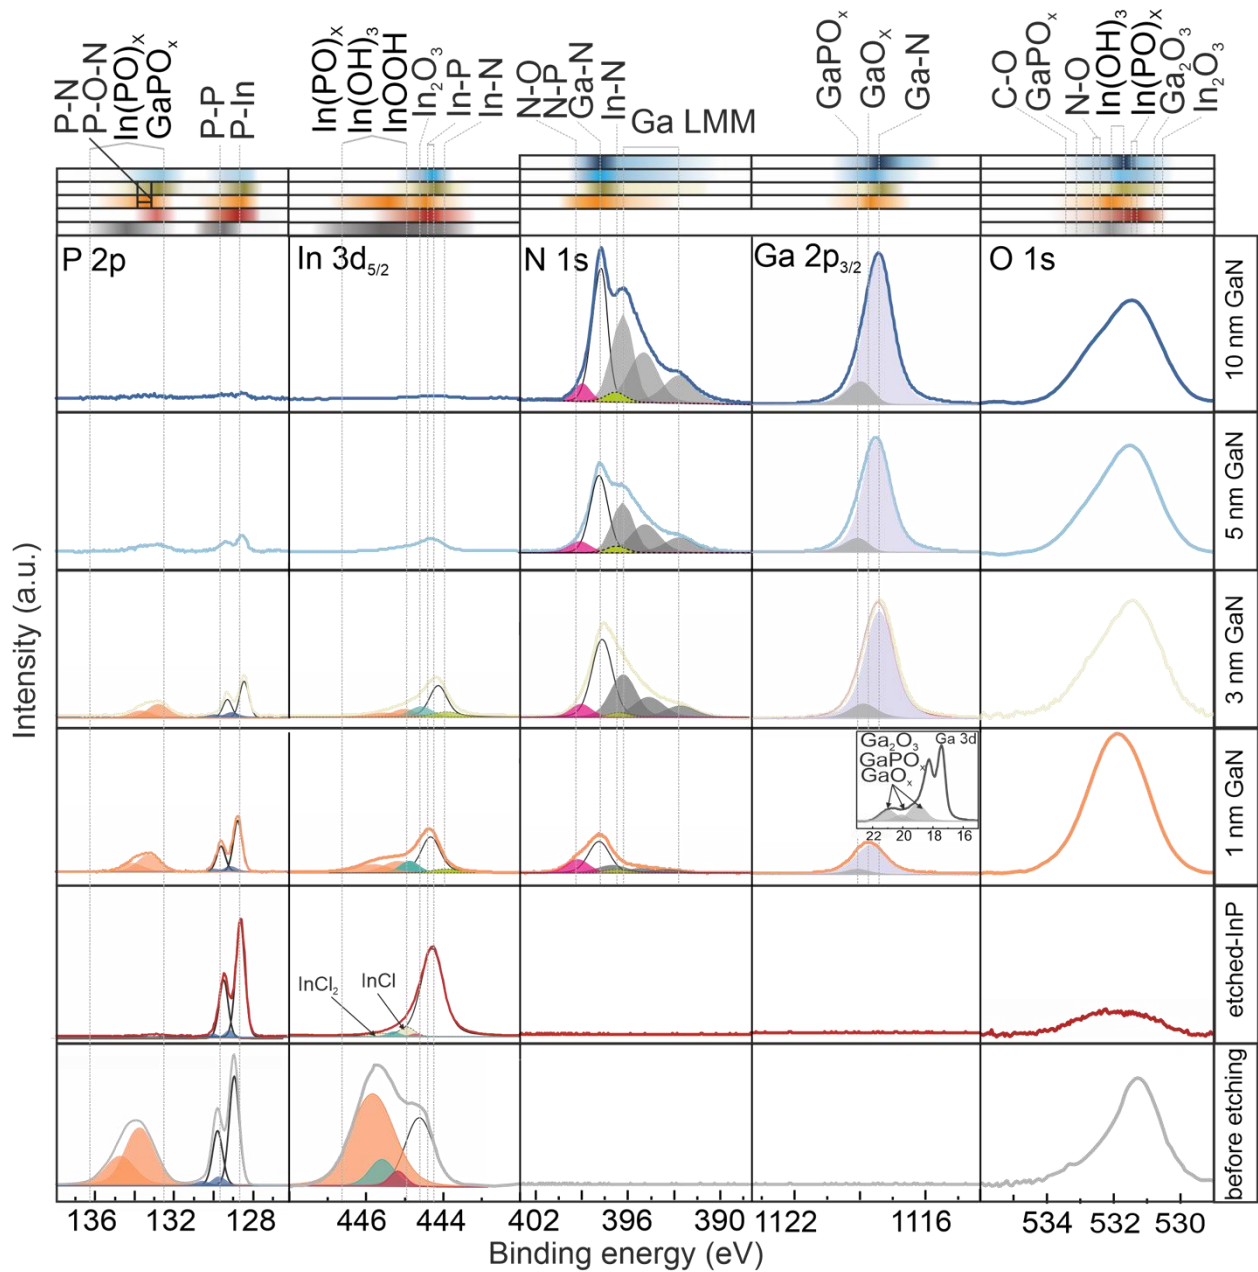

29

30 **Supplementary Fig. 4** Core-level XPS deconvolution results of P-2p, In-3d<sub>5/2</sub>, N-1s, Ga-2p<sub>3/2</sub>, and O-1s  
 31 region on InP samples with different thicknesses of GaN, native InP surface before etching, and InP surface  
 32 loaded in XPS immediately after 1 M HCl etching.

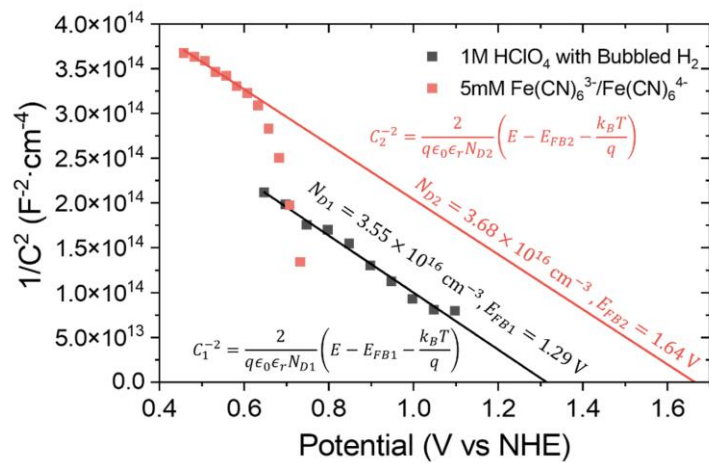

33

34 **Supplementary Fig. 5** Mott–Schottky plots of Pt/GaN/p-InP samples in the dark, measured in 1 M HClO<sub>4</sub>  
 35 electrolytes bubbled with H<sub>2</sub> (black square) and in 0.1 M K<sub>2</sub>SO<sub>4</sub> electrolyte dissolved with 5 mM/5 mM  
 36 ferrocyanide/ferricyanide redox mediators.

37

38 **Supplementary Table 1** Summary of reported performance of InP solar cell photocathodes with strategies  
 39 including nano/microstructure fabrications, ALD coating passivation, and chemical etching pretreatment.  
 40 This table shows our record-level photovoltage and photocurrent achieved by the new interface design.

| Structure                                                     | Onset potential                       | Photocurrent density<br>(under 1 sun) | Stability                            | Method                                                                           | Ref                                          |
|---------------------------------------------------------------|---------------------------------------|---------------------------------------|--------------------------------------|----------------------------------------------------------------------------------|----------------------------------------------|
| Single p-n junction<br>InP solar cells                        | 0.94 V (open<br>circuit<br>potential) | 34 mA cm <sup>-2</sup>                | –                                    | Solid-state p-n<br>junction                                                      | US Patent 9, 590,<br>131 B2, 7 March<br>2017 |
| pn <sup>+</sup> -InP/TiO <sub>2</sub> /Pt<br>(InP nanopillar) | 0.85 V vs RHE                         | 28 mA cm <sup>-2</sup>                | 6 hours                              | Epitaxy grown p-n <sup>+</sup><br>junction, 4 nm TiO <sub>2</sub><br>ALD coating | Adv. Funct. Mater.<br>2017, 26, 679          |
| p-InP/TiO <sub>2</sub> /Ru<br>(InP nanopillar)                | 0.73 V vs RHE                         | 37 mA cm <sup>-2</sup>                | 6 hours                              | InP nanopillars made<br>by RIE, 5 nm TiO <sub>2</sub><br>ALD coating             | Angew. Chem.<br>Int. Ed. 2012, 51,<br>10760  |
| p-InP/Pt                                                      | 0.71 V vs RHE                         | 18 mA cm <sup>-2</sup>                | 285 hours<br>(corroded<br>afterward) | InP etched by Br <sub>2</sub> and<br>NH <sub>3</sub>                             | Energy Environ.<br>Sci. 2021, 14,<br>6007    |
| <b>This work</b>                                              | 0.79 V vs RHE                         | 34 mA cm <sup>-2</sup>                | 160 hours<br>(no<br>corrosion)       | InP etched by HCl, 10<br>nm GaN ALD coating                                      | –                                            |

41

42 **Supplementary Table 2** Measured core level binding energies and valence band maxima (VBM) for bulk  
 43 InP and GaN layers, as well as InP/GaN heterostructures with different GaN thicknesses. The calculated  
 44 valence band offsets (VBO) were obtained using the Kraut method.

| Samples        | Peak position and VBM (eV) |        | VBO (eV) |
|----------------|----------------------------|--------|----------|
| Bulk InP       | E VBM                      | 0.8    | -        |
|                | P 2p                       | 128.5  |          |
|                | In 3d5/2                   | 444.3  |          |
| InP/GaN(10 nm) | E VBM                      | 2.8    |          |
|                | Ga 2p3/2                   | 1118.1 |          |
|                | N 1s                       | 397.7  |          |
| InP/GaN(1 nm)  | P 2p                       | 128.6  | 2.4      |
|                | In 3d5/2                   | 444.4  | 2.1      |
|                | N 1s                       | 397.8  | 2.4      |
|                | Ga 2p3/2                   | 1118.6 | 2.0      |
| InP/GaN(3 nm)  | P 2p                       | 128.4  | 2.1      |
|                | In 3d5/2                   | 444.2  | 1.9      |
|                | N 1s                       | 397.5  | 2.1      |
|                | Ga 2p3/2                   | 1118.2 | 1.9      |
| InP/GaN(5 nm)  | P 2p                       | 128.6  | 2.1      |
|                | In 3d5/2                   | 444.3  | 2.1      |
|                | N 1s                       | 397.8  | 2.1      |
|                | Ga 2p3/2                   | 1118.3 | 2.0      |

45

46 **Supplementary Note 1 | Comparison of GaN and TiO<sub>2</sub> for photocatalysis using InP light**  
47 **absorber.**

48 As shown in **Fig. 3a**, the TiO<sub>2</sub>/InP photocathode exhibited no discernible anodic current in cyclic  
49 voltammetry under illumination in the benzoquinone/hydroquinone (50/50 mM) redox mediator,  
50 in stark contrast to the mass-transport-limited pattern observed for GaN/InP under identical  
51 conditions. Furthermore, the resulting photocatalyst exhibited a hydrogen production rate of 16.7  
52  $\mu\text{mol cm}^{-2} \text{ h}^{-1}$ , whereas Rh–CrO<sub>x</sub>/TiO<sub>2</sub>/InP photocatalysts displayed negligible hydrogen  
53 evolution activity under identical conditions. Two factors account for the absence of ambipolar  
54 conductivity on TiO<sub>2</sub>. First, the conduction-band offset between TiO<sub>2</sub> and InP ( $\sim 0.45$  eV) presents  
55 a large barrier for hole transfer to the surface<sup>1,2</sup>. This offset favors electron extraction, which  
56 underlies its utility as a photocathode protection layer. However, the same offset poses a significant  
57 barrier to hole transfer and drives oxidative reactions at the solid–liquid interface, thereby  
58 preventing TiO<sub>2</sub> from supporting hole transport. Second, interfacial defect states at TiO<sub>2</sub>/InP  
59 enhance hole trapping and recombination, leaving only a negligible fraction of photogenerated  
60 holes available for interfacial reactions (as discussed in detail in the following section). Although  
61 defect states in TiO<sub>2</sub> coating have been proposed to mediate hole transport via intermediate-band  
62 conduction, this mechanism requires favorable energetic alignment with the InP valence band  
63 maximum<sup>3</sup>. In this system, the intermediate band of TiO<sub>2</sub> lies more positively in electrochemical  
64 potentials than the valence band maximum of InP, preventing effective hole transfer. In contrast,  
65 GaN functions not only as an effective passivation layer that promotes efficient electron  
66 conduction but also as an ambipolar coating that transports both charge-carrier types.

67

68 **Supplementary Note 2 | TR-SPV signatures of residual interfacial states and Pt-induced**  
69 **charge-carrier separation at GaN/InP interfaces.**

70 In addition to quantifying defect density, energy-resolved TR-SPV also reveals energetic features  
71 relevant to charge-carrier separation across the GaN-coated interface under photocatalytic  
72 conditions. Because the ambipolar transport discussed above may be associated with the remaining  
73 shallow interfacial states, we next analyze the absolute SPV spectra extracted at fixed delay times  
74 (**Fig. 4b**) to determine the energetic distribution of the residual interfacial states and the relaxation  
75 kinetics of the SPV response they support, thereby distinguishing shallow states compatible with  
76 charge-carrier transfer. In this analysis, the energetic position of the SPV features distinguishes  
77 between deeper and shallower defect states, whereas their time evolution indicates which states  
78 remain long-lived and which decay rapidly. At 10 ns after the laser pulse, the maximum positive  
79 SPV signals appeared at  $\sim 1.25$  eV and reached 0.17 and 0.10 V for samples #1 (TiO<sub>2</sub>/InP) and #2  
80 (Pt/TiO<sub>2</sub>/InP), respectively. For sample #3 (GaN/InP), the maximum positive SPV signal was only  
81 about 3 mV, and for sample #4 (Pt/GaN/InP) no positive signal was detected above the noise level  
82 ( $\sim 0.3$  mV at 1.2 eV). Thus, even at the earliest delay time, the population of promptly active deep  
83 states is already drastically suppressed at GaN/InP relative to TiO<sub>2</sub>/InP and is further reduced by  
84 the Pt overlayer by about 1.7-fold on TiO<sub>2</sub>/InP and about tenfold on GaN/InP. At longer delay  
85 times, the spectra further distinguish the nature of the remaining states. After 10 ms, a shoulder of

86 positive SPV signal appears at  $\sim 1.1$  eV for all samples, indicating the presence of relatively shallow  
87 traps at the InP surface. For sample #1 (TiO<sub>2</sub>/InP), the negative SPV signals also increase near the  
88 absorption onset of TiO<sub>2</sub> ( $\sim 3.3$  eV), and the SPV signals excited above 3.3 eV decay more slowly  
89 than those excited below 3.3 eV. By contrast, SPV signals related to fundamental absorption in  
90 TiO<sub>2</sub> are not observed on samples #2 (Pt/ TiO<sub>2</sub>/InP), #3 (GaN/InP), or #4 (Pt/GaN/InP). As a high-  
91 work-function metal ( $\sim 5.6$  eV), a Pt overlayer establishes a strongly coupled electron sink at the  
92 GaN surface and effectively pins the surface Fermi level, so electrons are preferentially transferred  
93 into Pt rather than stored in GaN/InP-related defect states. This band-alignment picture explains  
94 the additional reduction of  $N_{Q+}$  from  $\sim 10^{10}$  cm<sup>-2</sup> for GaN/InP to below  $\sim 10^9$  cm<sup>-2</sup> for Pt/GaN/InP.  
95 On Pt/ TiO<sub>2</sub>/InP, Pt acts as a recombination contact for charge carriers photogenerated in the TiO<sub>2</sub>  
96 surface layer, preventing this excitation channel from producing additional SPV. On Pt/GaN/InP,  
97 Pt instead acts primarily as an efficient sink for electrons transferred from InP through the GaN  
98 layer, which increases the average charge-carrier-separation length and therefore enhances the  
99 negative SPV signal relative to GaN/InP without Pt. In a photocatalytic configuration, where Pt-  
100 covered regions act as electron-collecting reduction sites while adjacent uncovered GaN regions  
101 remain available for hole transfer, this interfacial asymmetry can further establish a lateral driving  
102 force for charge-carrier separation. Therefore, the residual interfacial states at GaN/InP are shallow  
103 enough to remain compatible with hole transfer across the coating, as required by the ambipolar  
104 PEC and photocatalytic responses in **Fig.3**.

105

### 106 **Supplementary Note 3 | Comparison of GaN and TiO<sub>2</sub> for GaN/InP heterostructure**

107 **Supplementary Fig. 4** presents a systematic core-level XPS analysis of the GaN/InP  
108 heterostructure at different stages of interface formation, ranging from bare InP, i.e., before (gray)  
109 and after (red) wet-chemical etching using 1M HCl (aq), to progressively thicker GaN overlayers.  
110 The comparison between bare InP before and after wet-chemical etching provides a reference point  
111 for separating contributions of native oxides from interface-related species formed during GaN  
112 growth. Before etching, the InP surface shows clear signatures of a chemically complex native  
113 oxide, with oxide-hydroxide and phosphate-related components visible in the P 2p at BE of 132.5  
114 eV-136 eV, the pronounced shoulder at higher BE in In 3d<sub>5/2</sub>, and O 1s spectra. In the fitting of the  
115 In 3d<sub>5/2</sub> spectrum, the emission at 444.5 eV is correlated with In–P as a bulk-like bond in InP,  
116 whereas the emissions at 445.90 eV (orange) and at 445.6 eV (blue) are related to In–O–P and In-  
117 OH/In-OOH bonds. Due to the strong overlap of In–O–In (In<sub>2</sub>O<sub>3</sub>-like) and In–P emission lines, a  
118 reliable separation of these contributions is not feasible within the present spectral resolution;  
119 potential presence cannot be excluded. The emission attributed to In–O–P is also observed in the  
120 P 2p region at 132-136 eV, as illustrated in orange. After etching in 1 M HCl, these contributions  
121 are strongly reduced, indicating effective removal of phosphate-rich surface oxides. However, a  
122 closer look at higher BE of In 3d<sub>5/2</sub> core level reveals weak residual features, which may be  
123 associated with In–OH or In<sub>2</sub>O<sub>3</sub> species, as well as traces of InCl<sub>x</sub> formed during the etching  
124 process. Consistent with these observations, the O 1s spectra show features that support the

125 presence of In-O and In-OH bonds together with contributions associated with C–O–related bonds.  
126 This residual oxide, therefore, represents the starting surface onto which GaN is deposited.

127 With increasing GaN thicknesses, the InP-related P 2p and In 3d<sub>5/2</sub> signals progressively decrease  
128 in intensity, consistent with gradual surface coverage by the GaN overlayer. At low GaN  
129 thicknesses (1–3 nm), the spectra indicate a mixed interfacial chemistry.

130 In this regime, oxide-related components in the In 3d<sub>5/2</sub> and P 2p regions coexist with emerging N  
131 1s and Ga-2p signals. The O 1s spectra evolve significantly with increasing GaN thickness,  
132 displaying changes in peak shape and binding energy that reflect a redistribution of oxygen  
133 bonding configurations. Although no external oxygen source was introduced during ALD, the  
134 detected interfacial oxygen species most likely originate from transformations of residual native  
135 oxides into phosphate-like species during the first stages of GaN growth. At a few cycles of GaN  
136 (within the first ~20 cycles), the surface may not yet be fully covered, leaving areas exposed to air  
137 where oxygen can still create oxide/hydroxide bonds. This interpretation is supported by the In  
138 3d<sub>5/2</sub> spectra, which show higher-binding-energy asymmetry attribute to In–OH/In–OOH, In–O<sub>x</sub>  
139 and InPO<sub>x</sub> species, as well as weak components at 445–445.7 eV range at GaN thicknesses of 3–  
140 5 nm. At the same time, the P 2p higher-binding energy region exhibits an increase in intensity,  
141 indicating the formation of oxidized and nitrogen-containing phosphorus species. Possible  
142 assignments for these P 2p photoemission peaks include InPO<sub>x</sub>, GaPO<sub>x</sub>, and P–NO<sub>x</sub> species.  
143 However, the contribution of InPO<sub>x</sub> is expected to be limited, as no correspondingly strong PO<sub>x</sub>-  
144 related signal is observed in the In 3d<sub>5/2</sub> region. In contrast, the presence of GaPO<sub>x</sub> is supported by  
145 the Ga 2p<sub>3/2</sub> spectra and the Ga 3d inset, where oxide- and phosphate-related Ga components are  
146 resolved. In addition, the increase at higher binding energy in the P 2p region may partially  
147 originate from P–O–N, P–N species and P–O–Ga bonds. These observations indicate that the early-  
148 stage GaN/InP interface is not simply oxide-derived but evolves toward a nitride-containing  
149 interfacial chemistry in which P–N-related species become predominant. Although residual  
150 oxide/phosphate components remain detectable at very low GaN thickness, the deconvolution  
151 indicates that P–N and related Ga–N–P linkages are substantially enriched, whereas any In–N  
152 contribution is much smaller, amounting for only ~20% of the fitted P–N component. Thus, within  
153 the sensitivity of the XPS measurements, the interfacial chemistry is P–N-dominated nitride  
154 component with trace amount of residual oxides.

155

#### 156 **Supplementary Note 4 | Flat band potential of Pt/GaN/p-InP in ferricyanide/ferrocyanide** 157 **redox couple**

158 As shown in **Supplementary Fig. 5**, in ferricyanide/ferrocyanide, the flat-band potential shifted  
159 to 1.64 V vs NHE, reflecting the ~0.36 V difference in redox potential compared to in 1 M HClO<sub>4</sub>  
160 bubbled with 1 atm H<sub>2</sub>. This redox-dependent alignment indicates that the GaN/InP forms a solid–  
161 liquid junction in which the band edges of GaN-passivated InP shift together with the  
162 electrochemical potential of the ferricyanide/ferrocyanide solution<sup>4</sup>. Importantly, the barrier height

163 for electrons of  $\sim 1.23$  V is preserved in both  $H^+/H_2$  and ferricyanide/ferrocyanide redox couple.  
164 Therefore, these dynamic band edge positions at difference redox couple enables efficient charge-  
165 carrier separation under diverse (photo-)electrochemical environments and accounting for the high  
166 photocatalytic activity of GaN/InP.

167

## 168 **Reference**

- 169 1. Zare Pour MA, Qaisrani MN, Höhn C, Wolf JL, Mogharehabet N, Velazquez Rojas J, *et al.* Composition and  
170 Resulting Band Alignment at the  $TiO_2/InP$  Heterointerface: A Fundamental Study Combining Photoemission  
171 Spectroscopy and Theory. *Adv. Funct. Mater.*, **36**(21): 2506105.
- 172 2. Lin Y, Kapadia R, Yang J, Zheng M, Chen K, Hettick M, *et al.* Role of  $TiO_2$  Surface Passivation on Improving  
173 the Performance of p-InP Photocathodes. *J. Phys. Chem. C* 2015, **119**(5): 2308-2313.
- 174 3. Shen X, Zhao T, Su H, Yang M, Chen J, Liu Y, *et al.* Tuning Intermediate Bands of Protective Coatings to  
175 Reach the Bulk-Recombination Limit of Stable Water-Oxidation GaP Photoanodes. *Adv. Energy Mater.* 2022,  
176 **12**(29): 2201314.
- 177 4. Mills TJ, Lin F, Boettcher SW. Theory and Simulations of Electrocatalyst-Coated Semiconductor Electrodes  
178 for Solar Water Splitting. *Phys. Rev. Lett.* 2014, **112**(14): 148304.

179
